# Supplementary material for: Whole-genome sequencing reveals that mutations in myosin-5 confer resistance to the fungicide phenamacril in Fusarium graminearum
Source: PubMed Central journal article supplement (PMC5389027; doi:10.1038/srep08248), 2015-02-04
Supplement: srep08248-s1.pdf [file srep08248-s1.pdf]

## **Supplementary Information**

**Whole-genome sequencing reveals that mutations in myosin-5 confer resistance to the fungicide phenamacril in *Fusarium graminearum***

Zhitian Zheng, Yiping Hou, Yiqiang Cai, Yu Zhang, Yanjun Li, and Mingguo Zhou

**Fig. S1.** Frequency of changes in bases in a phenamacril-resistant strain (YP-1) of *Fusarium graminearum* as indicated by whole-genome sequencing. Changes are relative to reference strain PH-1.

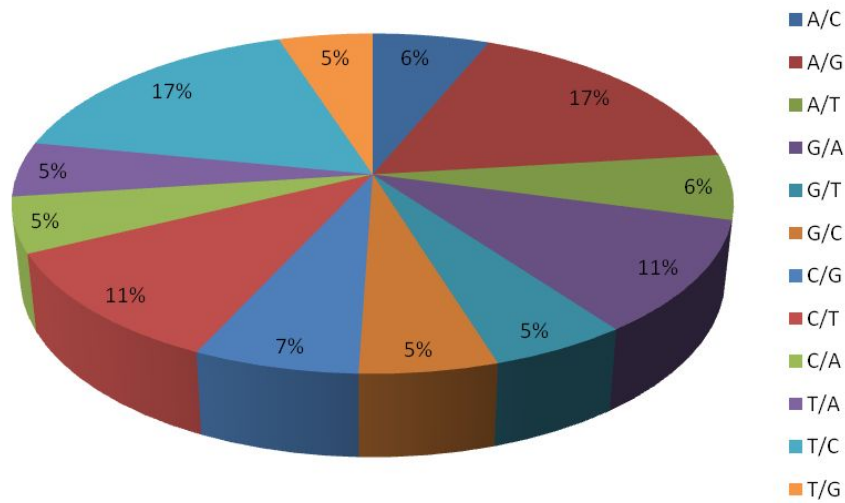

**Fig. S2.** The alignment of the amino acid sequences of myosin-5 motor domain with those from *F. oxysporum*, *B. cinerea*, *M. oryzae* and *B. graminis*. ATP-binding site and SH1 helix were blast by NCBI database (<http://www.ncbi.nlm.nih.gov/>). Codon 216 and 420 are conserved in all the five myosin motor.

ATP-binding site

FgMyo5 39 **CVSDLTLLSKVSNEAINENLKKRFEGREIYTYIGHVIVSVNPPFRDLGIYTDVLCQSYL** 98  
 FoMyo1 39 **CVSDLTLLSKVSNEAINENLKKRFEGREIYTYIGHVIVSVNPPFRDLGIYTDVLESY** 98  
 BcMyo1 40 **CVSDLTLLSKVSNEAINENLKKRFENREIYTYIGHVIVSVNPPFRDLGIYTDVLD** 99  
 MgMyo1 42 **CVSDLTLLSKVSNEAINENLQKRFEGREIYTYIGHVIVSVNPPFRDLGIYTDVLD** 101  
 BgMyo

ATP-binding site

FgMyo5 99 **NRLEMPPHVFAIAEASYYNMKAYS**DNQCVIISGESGAGKTEAAKRIMQYIASVSGGESGD 158  
 FoMyo1 99 **NRLEMPPHVFAIAEASYYNMKAYS**DNQCVIISGESGAGKTEAAKRIMQYIASVSGGESGD 158  
 BcMyo1 100 **NRLEMPPHVFAIAEASYYNMKAYKDNQCVIISGESGAGKTEAAKRIMQYIANVSGGS** 159  
 MgMyo1 102 **NRLEMPPHVFAIAEASYYNMKAYKDNQCVIISGESGAGKTEAAKRIMQYIASVSGG** 161  
 BgMyo 1 -----**MKAYKENQCVIISGESGAGKTEAAKRIMQYIASVSGGSNTS** 41

216 217

FgMyo5 **IQIKDMVLATNPLESFCNAKTLRNNNSSRFGKYLQIFNFNQGEFVGADITNYLLEKSR** 218  
 FoMyo1 **IQIKDMVLATNPLESFCNAKTLRNNNSSRFGKYLQIFNFNQGEFVGADITNYLLEKSR** 218  
 BcMyo1 **IQIKDMVLATNPLESFCNAKTLRNNNSSRFGKYLQIFNFNQGEFVGADITNYLLEKSR** 219  
 MgMyo1 **IQIKDMVLATNPLESFCNAKTLRNNNSSRFGKYLQIFNFNSVGEFVGADITNYLLEKSR** 221  
 BgMyo **IQIKDMVLATNPLESFCNAKTLRNNNSSRFGKYLQIFNFNSQGEFVGADITNYLLEKSR** 101

FgMyo5 **VVGQITNERNFHIFYQFAKGSACQYRETFVQKPEYVYTSRSKCLDVDGIDDLAEFQDT** 278  
 FoMyo1 **VVGQITNERNFHIFYQFAKGSACQYRETFVQKPEYVYTSRSKCLDVDGIDDLAEFQDT** 278  
 BcMyo1 **VVGQITNERNFHIFYQFAKGSACQYRETFVQKPEYVYTSRSKCLDVDGIDDLAEFQDT** 279  
 MgMyo1 **VVGQITNERNFHIFYQFAKGSACQYRETFVQKPEYVYTSRSKCLDVDGIDDLAEFQDT** 281  
 BgMyo **VVGQITNERNFHIFYQFAKGSACQYRETFVQKPEYVYTSRSKCLDVDGIDDLAEFQDT** 161

FgMyo5 **INAMKVIIGLSQEQDEIFRMLSAIIWIGNIQFCEDCGYAEVVDERSVVDFAAYLLEVD** 338  
 FoMyo1 **INAMKVIIGLSQEQDEIFRMLSAIIWIGNIQFCEDCGYAEVVDERSVVDFAAYLLEVD** 338  
 BcMyo1 **INAMKVIIGLSQEQDEIFRMLSAIIWIGNIQFCEDCGYAEVVDERSVVDFAAYLLEVD** 339  
 MgMyo1 **INAMKVIIGLSQEQDEIFRMLSAIIWIGNIQFCEDCGYAEVVDERSVVDFAAYLLEVD** 341  
 BgMyo **INAMKVIIGLSQEQDEIFRMLSAIIWIGNIQFCEDCGYAEVVDERSVVDFAAYLLEVD** 221

FgMyo5 **QLIKGITIRILTPRNGEVIESEANFAQACATRDALAMAIYSNLFWDWIVERINKSLKARQP** 398  
 FoMyo1 **QLIKGITIRILTPRNGEVIESEANFAQACATRDALAMAIYSNLFWDWIVERINKSLKARQP** 398  
 BcMyo1 **QLIKGITIRILTPRNGEVIESEANFAQACATRDALAKAIYNNLFDWIVERINKSLKARQP** 399  
 MgMyo1 **QLIKGITIRILTPRNGEVIESEANFAQACATRDALAKAIYNNLFDWIVERINKSLKARQP** 401  
 BgMyo **QLIKGITIRILTPRNGEVIESEANFAQACATRDALAKAIYNNLFDWIVERINKSLKARQP** 281

418 420

FgMyo5 **TINTIGILDYGFIEFEKNSFEQLCINYNVEKLOQIFQLTLKAEQEEYAREQIQWTPPIK** 458  
 FoMyo1 **TINTIGILDYGFIEFEKNSFEQLCINYNVEKLOQIFQLTLKAEQEEYAREQIQWTPPIK** 458  
 BcMyo1 **TINTIGILDYGFIEFEKNSFEQLCINYNVEKLOQIFQLTLKAEQEEYAREQIQWTPPIK** 459  
 MgMyo1 **TINTIGILDYGFIEFEKNSFEQLCINYNVEKLOQIFQLTLKAEQEEYAREQIQWTPPIK** 461  
 BgMyo **TINTIGILDYGFIEFEKNSFEQLCINYNVEKLOQIFQLTLKAEQEEYAREQIQWTPPIK** 341

FgMyo5 **YFDNKVVDLIEQIREVGFISAMKDATKTAHADEAACDRTFMQSINGMSIAHLTPRQGNF** 518  
 FoMyo1 **YFDNKVVDLIEQIREVGFISAMKDATKTAHADEAACDRTFMQSINGMSIAHLTPRQGNF** 518  
 BcMyo1 **YFDNKVVDLIEQIREVGFISAMKDATKTAHADEAACDRTFMQSINGMSIAHLTPRQGNF** 519  
 MgMyo1 **YFDNKVVDLIEQIREVGFISAMKDATKTAHADEAACDRTFMQSINGMSIAHLTPRQGNF** 521  
 BgMyo **YFDNKVVDLIEQIREVGFISAMKDATKTAHADEAACDRTFMQSINGMSIAHLTPRQGNF** 401

FgMyo5 **IIKHYAGDVYTYTVEGITDKNKDQLKGLLALFQHSQNFVHTLFRFVDQDNRKQPPSAG** 578  
 FoMyo1 **IIKHYAGDVYTYTVEGITDKNKDQLKGLLALFQHSQNFVHTLFRFVDQDNRKQPPSAG** 578  
 BcMyo1 **IIKHYAGDVYTYTVEGITDKNKDQLKGLLALFQHSQNFVHTLFRFVDQDNRKQPPSAG** 579  
 MgMyo1 **IIKHYAGDVYTYTVEGITDKNKDQLKGLLALFQHSQNFVHTLFRFVDQDNRKQPPSAG** 581  
 BgMyo **IIKHYAGDVYTYTVEGITDKNKDQLKGLLALFQHSQNFVHTLFRFVDQDNRKQPPSAG** 461

SH1 helix

FgMyo5 **DRIRASANALVDTIMKQPSYIRTIKENENKSPTEYN**GENVLHQIKYLGLENVRRIRAG 638  
 FoMyo1 **DRIRASANALVDTIMKQPSYIRTIKENENKSPTEYN**GENVLHQIKYLGLENVRRIRAG 638  
 BcMyo1 **DRIRASANALVDTIMKQPSYIRTIKENENKSPTEYN**GENVLHQIKYLGLENVRRIRAG 639  
 MgMyo1 **DRIRASANALVDTIMKQPSYIRTIKENENKSPTEYN**GENVLHQIKYLGLENVRRIRAG 641  
 BgMyo **DRIRASANALVDTIMKQPSYIRTIKENENKSPTEYN**GENVLHQIKYLGLENVRRIRAG 521

FgMyo5 **FAYRQDFDKFVDRFFLLSEATSYAGEFTWECTTEAAVKQILKDTSIPEEWCQMGVTKAFI** 698  
 FoMyo1 **FAYRQDFDKFVDRFFLLSEATSYAGEFTWECTTEAAVKQILKDTSIPEEWCQMGVTKAFI** 698  
 BcMyo1 **FAYRQDFDKFVDRFFLLSEATSYAGEFTWECTTEAAVKQILKDTSIPEEWCQMGVTKAFI** 699  
 MgMyo1 **FAYRQDFDKFVDRFFLLSEATSYAGEFTWECTTEAAVKQILKDTSIPEEWCQMGVTKAFI** 701  
 BgMyo **FAYRQDFDKFVDRFFLLSEATSYAGEFTWECTTEAAVKQILKDTSIPEEWCQMGVTKAFI** 581

FgMyo5 **KAPETLFALEHMR** 711  
 FoMyo1 **KAPETLFALEHMR** 711  
 BcMyo1 **KAPETLFALEHMR** 712  
 MgMyo1 **KAPETLFALEHMR** 714  
 BgMyo **KAPETLFALEHMR** 594

**Fig. S3.** Relative expression of 10 differentially expressed genes as indicated by RNA-Seq and qRT-PCR. Values are means ( $\pm$  SE for qRT-PCR) of three repeated experiments.

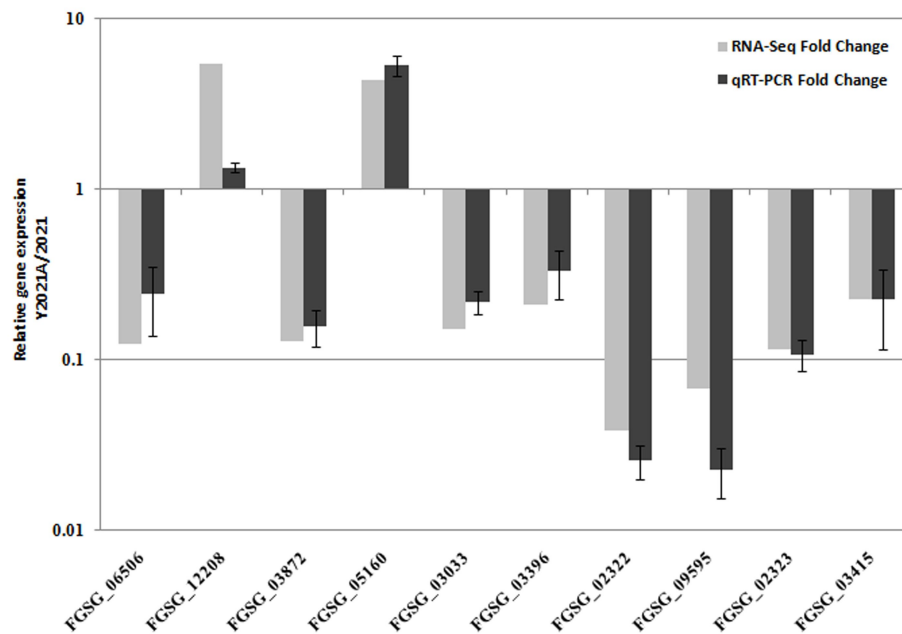

**Fig. S4.** Functional categorization of differentially expressed genes based on known genes in the Uniprot database. Gene Ontology (GO) terms at the 2nd level were plotted here, and in this ontology, “Cellular component”, “Molecular function”, and “Biological process” are categorized independently.

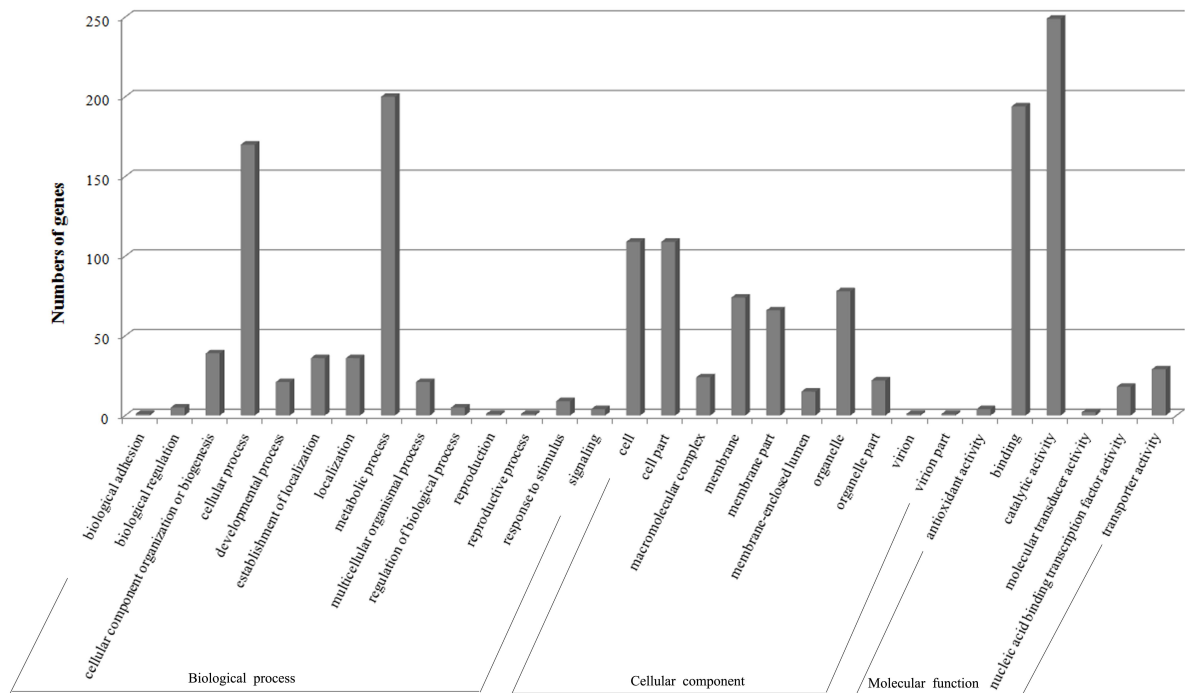

**Fig. S5.** Schematic representation of homology modelling of the *Fusarium graminearum* myosin-5 motor domain (A), general chemical structure of phenamacril (B), model of phenamacril (C), and ribbon models of myosin in *Dictyostelium discoideum* 4A7F (D). In (A) amino acids Lys216, Ser217, Ser418, and Glu420 of the myosin-5 motor domain are shown in yellow. Amino acids at these sites formed a similar ‘pocket’. In (C), blue and red represent nitrogen and oxygen atoms, respectively. In (D) Ribbon models of myosin in the crystal structure of the actin-tropomyosin-myosin complex in *Dictyostelium discoideum*, amino acids at sites 186, 187, 397 and 399 are conserved with that of the myosin-5 motor domain. These sites also formed a similar ‘pocket’.



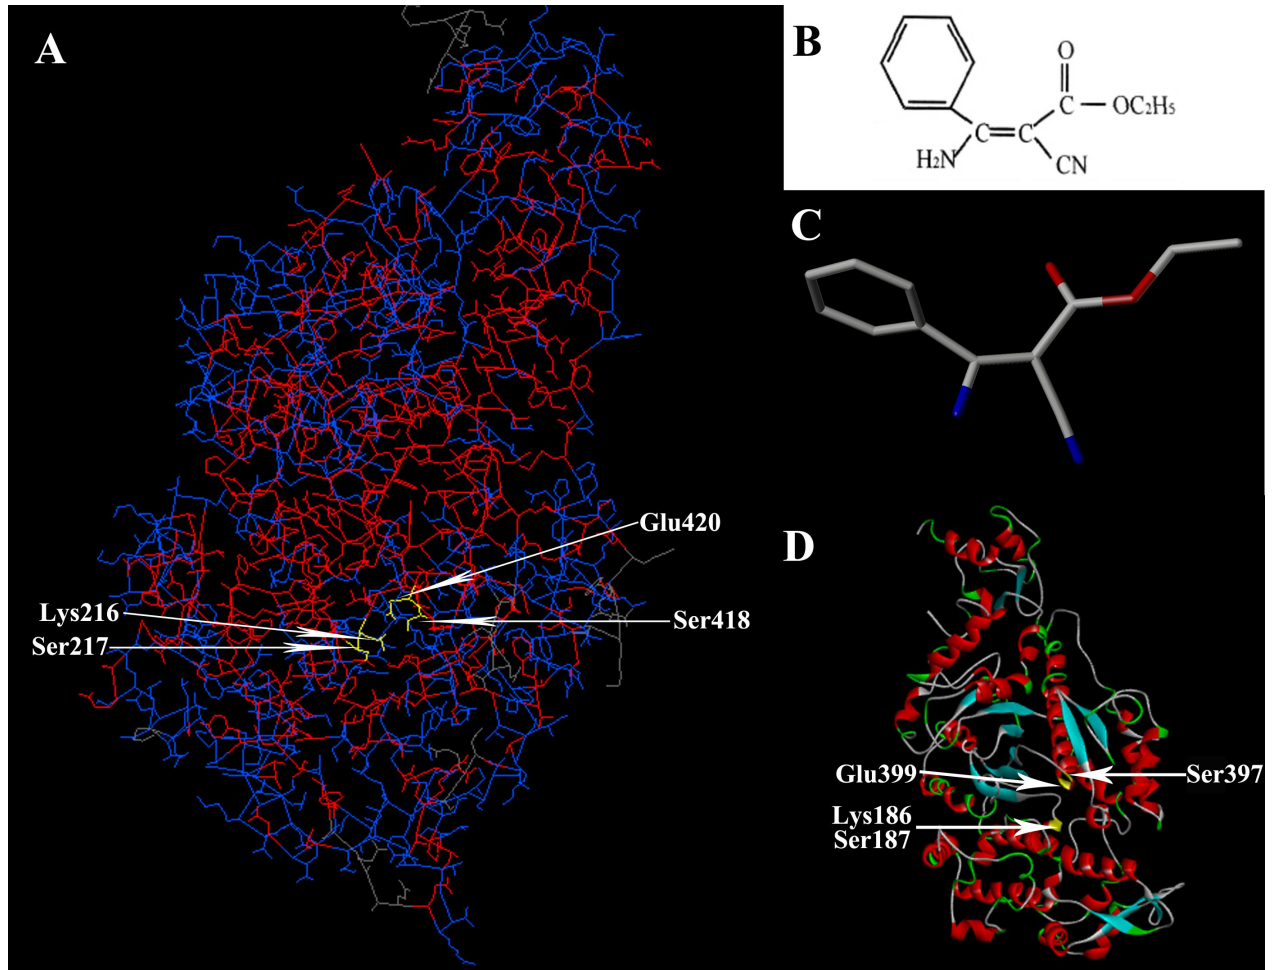

Table S1. Oligonucleotide primers used in this study.

| Primer code | Primer | Sequence (5'-3')                      | Relevant characteristics                                                                  |
|-------------|--------|---------------------------------------|-------------------------------------------------------------------------------------------|
| 1           | A1     | TTGCGGTAGGAGAAGATG                    | PCR primers for amplification of the upstream <i>myosin-5</i> fragment                    |
| 2           | A2     | AGCCAGCCAACAGCTCCCAAGGGAAACTCTGGAAGC  |                                                                                           |
| 3           | A3     | TACGCAAACCGCCTCTCCCCTCCTCCGTGCCGTGATA | PCR primers for amplification of the <i>myosin-5</i> mutant zone fragment                 |
| 4           | A4     | TCGGCTGGGACTTGTGAA                    | A pair of PCR primers for identification of replacement integration at the left junction. |
| 5           | A5     | CAGGCTTGGTCTGGTTGG                    |                                                                                           |
| 6           | A6     | CCGTGGTTGGCTTGTATG                    |                                                                                           |

|    |              |                         |                                                                                                                                 |
|----|--------------|-------------------------|---------------------------------------------------------------------------------------------------------------------------------|
| 7  | A7           | ATTTGGATGCTTGGGTAG      | A pair of PCR primers for identification of replacement integration at the right junction.                                      |
| 8  | A8           | ATAGAAGCAGCGGCAGAG      |                                                                                                                                 |
| 9  | hphF         | GGGAGCTGTTGGCTGGCTGGTGG | PCR primers for amplification of the 1.7-kb <i>hph</i> resistance gene containing the <i>Aspergillus nidulans</i> trpC promoter |
| 10 | hphR         | GGGGAGAGGCGTTTGCCTATTG  |                                                                                                                                 |
| 11 | myo5-prob eF | GTTTACCGACATTACCGC      | PCR primers to amplify the 622-bp myosin-5 upstream fragment used as probe for Southern blot                                    |
| 12 | myo5-prob eR | TTCTAGTGGTGCCCTGACG     |                                                                                                                                 |
| 13 | Myo5-F       | TCACAAGTCCCAGCCGATTA    | Quantitative real-time PCR primers for analysis of <i>myosin-5</i> expression                                                   |
| 14 | Myo5-R       | GGTTGCCTTGAATGCGAGA     |                                                                                                                                 |
| 15 | Myo2B-F      | GCAGTCCCTCGGTTCTATGA    | Quantitative real-time PCR primers for analysis of <i>myosin-2B</i> expression                                                  |
| 16 | Myo2B-R      | CTGGTTGGCTTCCGTCTGT     |                                                                                                                                 |
| 17 | 08719cF      | GCCTTGGACAGGGTTTCATT    | Quantitative real-time PCR primers for analysis of <i>type II myosin</i> expression                                             |
| 18 | 08719cR      | TCCTCCTCAGATTCGGCAC     |                                                                                                                                 |
| 19 | GAPDH-F      | CTTACTGCCTCCACCAACTG    | Quantitative real-time PCR primers for analysis of the elongation factor 1-alpha gene expression                                |
| 20 | GAPDH-R      | TGACGTTGGAAGGAGCGAAG    |                                                                                                                                 |
| 21 | 01099F       | GACCGCTCGCTCAACAGA      | PCR primers for amplification of the FGSG_01099 fragment                                                                        |
| 22 | 01099R       | CCATAATCACGCTGCTGT      |                                                                                                                                 |
| 23 | 01234F       | CGCTCATCACTCGGCTAC      | PCR primers for amplification of the FGSG_01234 fragment                                                                        |
| 24 | 01234R       | AGTCTGGCAACAGCATCG      |                                                                                                                                 |
| 25 | 01410F       | TCCCGTCAGGCACCACTA      | PCR primers for amplification of the FGSG_01410 fragment                                                                        |
| 26 | 01410R       | CGGTTGCCAGTTCAGTC       |                                                                                                                                 |
| 27 | 01675F       | CACTGGTTACGCTTCTCG      | PCR primers for amplification of the FGSG_01675 fragment                                                                        |
| 28 | 01675R       | GTCAAGGCGATGAGGATA      |                                                                                                                                 |
| 29 | 02501F       | TCCCTCCTCATCTCAACG      | PCR primers for amplification of the FGSG_02501 fragment                                                                        |
| 30 | 02501R       | TCAAGTGTAAGGGCGGTA      |                                                                                                                                 |
| 31 | 03065F       | CCAAGACCTGGGAACATC      | PCR primers for amplification of the FGSG_03065 fragment                                                                        |
| 32 | 03065R       | GTACTTGGAGTGCTGGGT      |                                                                                                                                 |
| 33 | 03772F       | ATGCCTCAGACGACAACA      | PCR primers for amplification of the FGSG_03772 fragment                                                                        |
| 34 | 03772R       | GCAAATCTGCCTGGGACT      |                                                                                                                                 |
| 35 | 05615F       | TCTGCTCCCCGCCACAAA      | PCR primers for amplification of the FGSG_05615 fragment                                                                        |
| 36 | 05615R       | TGGCATCGTTGGGCATAG      |                                                                                                                                 |
| 37 | 05894F       | GCCGAGACAATGCCACA       | PCR primers for amplification of the FGSG_05894 fragment                                                                        |
| 38 | 05894R       | AGAGCAATGGTGGTGTCC      |                                                                                                                                 |
| 39 | 06998F       | ACACTCGTTGGCTCTTGG      | PCR primers for amplification of the FGSG_06998 fragment                                                                        |
| 40 | 06998R       | TGCAACCCTAACTATCCC      |                                                                                                                                 |
| 41 | 09397R       | AGGCTTTGACAGGCTCCA      | PCR primers for amplification of the FGSG_09397 fragment                                                                        |
| 42 | 09397R       | GCTCAGTTCTCCTCGTC       |                                                                                                                                 |
| 43 | 09895F       | GTCCGTGCCCTATCCTGT      | PCR primers for amplification of the FGSG_09895 fragment                                                                        |
| 44 | 09895R       | TTCGCTCCGTCACAAACA      |                                                                                                                                 |
| 45 | 10358F       | GCCAGTTGGTGTCTTCT       | PCR primers for amplification of the FGSG_10358 fragment                                                                        |
| 46 | 10358R       | TTCGAAACAAGGAATGA       |                                                                                                                                 |

|    |          |                       |                                        |
|----|----------|-----------------------|----------------------------------------|
| 47 | 11973F   | CCTCGTTCCTTGCTGTA     | PCR primers for amplification of the   |
| 48 | 11973R   | CGACCATACGCCAGTTGA    | FGSG_11973 fragment                    |
| 49 | 12039F   | TACCTGCGTTGAGGAAGA    | PCR primers for amplification of the   |
| 50 | 12039R   | CTTTCGCCAGCAAACCTCT   | FGSG_12039 fragment                    |
| 51 | 12129F   | CTGTTGCGGTGGATGTCA    | PCR primers for amplification of the   |
| 52 | 12129R   | CCAAACGCCAACTGACTG    | FGSG_12129 fragment                    |
| 53 | 12369F   | GTTCTCGCCACAGTTCAA    | PCR primers for amplification of the   |
| 54 | 12369R   | TGGTAGAACGGTCGGTGG    | FGSG_12369 fragment                    |
| 55 | 12745F   | GGACCACCTTATTACCGC    | PCR primers for amplification of the   |
| 56 | 12745R   | GCGGATGTTGTTGCGTAG    | FGSG_12745 fragment                    |
| 57 | 13343F   | GCACTGGTTCGTCGGTAG    | PCR primers for amplification of the   |
| 58 | 13343R   | GCAGAGGTCCGAGTTAGA    | FGSG_13343 fragment                    |
| 59 | 13620F   | AGTTTCGTTCTTTCCCTC    | PCR primers for amplification of the   |
| 60 | 13620R   | AATGGAGACAATCTACCG    | FGSG_13620 fragment                    |
| 61 | 13823F   | GATGGTGGACAAGATGAC    | PCR primers for amplification of the   |
| 62 | 13823R   | TCCAGCCTTGAAATACTC    | FGSG_13823 fragment                    |
| 63 | 13897F   | CGCAAGGACACTACCAAC    | PCR primers for amplification of the   |
| 64 | 13897R   | AGAGCAAGGAGCCAATCA    | FGSG_13897 fragment                    |
| 65 | 02322rtF | TCTGGTGGTGCATCAACGG   | Quantitative real-time PCR primers for |
| 66 | 02322rtR | ATAAGACCGCCACCGACTGA  | analysis of FGSG_02322 expression      |
| 67 | 02323rtF | CAGCAAGCACAATACCGCAG  | Quantitative real-time PCR primers for |
| 68 | 02323rtR | TGGGATGGTAAACCGAGAGC  | analysis of FGSG_02323 expression      |
| 69 | 03033rtF | GCAATGTGCTTCAGTTTCGG  | Quantitative real-time PCR primers for |
| 70 | 03033rtR | AACAACAGCCATCGCATACC  | analysis of FGSG_03033 expression      |
| 71 | 03396rtF | CGTCGGTGTATCAGTGCCA   | Quantitative real-time PCR primers for |
| 72 | 03396rtR | CAAATCGTCCTGCCAATGCT  | analysis of FGSG_03396 expression      |
| 73 | 03415rtF | GCATCGCAAATGGCAGTG    | Quantitative real-time PCR primers for |
| 74 | 03415rtR | AGCATTGCGGAGCGACATAG  | analysis of FGSG_03415 expression      |
| 75 | 03872rtF | ATCGCTGGTATCGGTTTCGTG | Quantitative real-time PCR primers for |
| 76 | 03872rtR | CGGAGTGCTGAGGATGAATG  | analysis of FGSG_03872 expression      |
| 77 | 05160rtF | CTTTGCTGGCTGCTGTGTTG  | Quantitative real-time PCR primers for |
| 78 | 05160rtR | ATAGCGTTGAAGATGCCCCA  | analysis of FGSG_05160 expression      |
| 79 | 06506rtF | TGGTTACGCCAATGTTTCCG  | Quantitative real-time PCR primers for |
| 80 | 06506rtR | CAGCGTTGGCAGCATAGTTC  | analysis of FGSG_06506 expression      |
| 81 | 09595rtF | GCAACTGGCGACTCATTCTG  | Quantitative real-time PCR primers for |
| 82 | 09595rtR | TGAGCACGAGGGGAATGGT   | analysis of FGSG_09595 expression      |
| 83 | 12208rtF | GGACACTCCCGACAACACA   | Quantitative real-time PCR primers for |
| 84 | 12208rtR | AAGCCCACGATTTCTTGTTG  | analysis of FGSG_12208 expression      |

---



Table S2. Statistics of 132 genes with amino acid mutations.

| Gene       | Description                             | Synonymous SNPs | Non-synonymous SNPs |
|------------|-----------------------------------------|-----------------|---------------------|
| FGSG_00100 | hypothetical protein                    | 1               | 0                   |
| FGSG_00180 | hypothetical protein                    | 1               | 3                   |
| FGSG_00410 | hypothetical protein                    | 0               | 1                   |
| FGSG_00554 | hypothetical protein                    | 0               | 1                   |
| FGSG_00614 | hypothetical protein                    | 2               | 2                   |
| FGSG_00727 | hypothetical protein                    | 2               | 11                  |
| FGSG_00924 | hypothetical protein                    | 0               | 1                   |
| FGSG_00925 | hypothetical protein                    | 0               | 2                   |
| FGSG_01099 | GTP-binding nuclear protein<br>GSP1/Ran | 0               | 2                   |
| FGSG_01116 | hypothetical protein                    | 0               | 1                   |
| FGSG_01156 | hypothetical protein                    | 0               | 1                   |
| FGSG_01163 | hypothetical protein                    | 2               | 5                   |
| FGSG_01234 | adenylate cyclase                       | 0               | 2                   |
| FGSG_01410 | myosin-5                                | 0               | 1                   |
| FGSG_01434 | hypothetical protein                    | 0               | 2                   |
| FGSG_01501 | hypothetical protein                    | 1               | 2                   |
| FGSG_01545 | hypothetical protein                    | 0               | 1                   |
| FGSG_01641 | hypothetical protein                    | 0               | 1                   |
| FGSG_01675 | dicarboxylic amino acid permease        | 0               | 2                   |
| FGSG_01899 | hypothetical protein                    | 0               | 1                   |
| FGSG_01927 | hypothetical protein                    | 0               | 1                   |
| FGSG_01981 | hypothetical protein                    | 0               | 2                   |
| FGSG_02229 | hypothetical protein                    | 1               | 2                   |
| FGSG_02501 | transcriptional repressor rco-1         | 1               | 3                   |
| FGSG_02594 | hypothetical protein                    | 0               | 1                   |
| FGSG_02679 | hypothetical protein                    | 0               | 1                   |
| FGSG_02799 | hypothetical protein                    | 0               | 1                   |
| FGSG_02896 | hypothetical protein                    | 0               | 1                   |
| FGSG_03065 | phytoene dehydrogenase                  | 0               | 6                   |
| FGSG_03191 | hypothetical protein                    | 0               | 2                   |
| FGSG_03550 | hypothetical protein                    | 2               | 4                   |
| FGSG_03772 | drug resistance protein                 | 0               | 1                   |
| FGSG_04091 | hypothetical protein                    | 0               | 1                   |
| FGSG_04189 | hypothetical protein                    | 3               | 4                   |
| FGSG_04370 | hypothetical protein                    | 0               | 2                   |
| FGSG_04373 | hypothetical protein                    | 0               | 1                   |
| FGSG_04439 | hypothetical protein                    | 0               | 2                   |
| FGSG_04871 | hypothetical protein                    | 1               | 2                   |
| FGSG_04890 | hypothetical protein                    | 0               | 3                   |
| FGSG_04987 | hypothetical protein                    | 0               | 2                   |
| FGSG_05347 | hypothetical protein                    | 5               | 5                   |

|            |                                             |   |    |
|------------|---------------------------------------------|---|----|
| FGSG_05615 | adenosylhomocysteinase                      | 0 | 1  |
| FGSG_05794 | hypothetical protein                        | 2 | 4  |
| FGSG_05883 | hypothetical protein                        | 0 | 2  |
| FGSG_05894 | serine/threonine protein<br>phosphatase 2A  | 1 | 2  |
| FGSG_06175 | hypothetical protein                        | 0 | 1  |
| FGSG_06302 | hypothetical protein                        | 0 | 1  |
| FGSG_06431 | hypothetical protein                        | 0 | 2  |
| FGSG_06445 | hypothetical protein                        | 0 | 1  |
| FGSG_06998 | glucan synthesis regulatory protein         | 4 | 12 |
| FGSG_07013 | hypothetical protein                        | 0 | 1  |
| FGSG_07078 | hypothetical protein                        | 0 | 1  |
| FGSG_07133 | hypothetical protein                        | 0 | 1  |
| FGSG_07525 | hypothetical protein                        | 2 | 5  |
| FGSG_07526 | hypothetical protein                        | 0 | 1  |
| FGSG_07562 | hypothetical protein                        | 0 | 2  |
| FGSG_07807 | hypothetical protein                        | 0 | 1  |
| FGSG_08249 | hypothetical protein                        | 0 | 1  |
| FGSG_08608 | hypothetical protein                        | 0 | 1  |
| FGSG_08701 | hypothetical protein                        | 0 | 1  |
| FGSG_08759 | hypothetical protein                        | 0 | 1  |
| FGSG_08842 | hypothetical protein                        | 0 | 5  |
| FGSG_08955 | hypothetical protein                        | 2 | 3  |
| FGSG_09281 | hypothetical protein                        | 2 | 4  |
| FGSG_09318 | hypothetical protein                        | 0 | 3  |
| FGSG_09329 | hypothetical protein                        | 0 | 2  |
| FGSG_09397 | glycylpeptide<br>N-tetradecanoyltransferase | 0 | 2  |
| FGSG_09478 | hypothetical protein                        | 1 | 1  |
| FGSG_09605 | hypothetical protein                        | 0 | 2  |
| FGSG_09686 | hypothetical protein                        | 2 | 1  |
| FGSG_09762 | hypothetical protein                        | 2 | 1  |
| FGSG_09876 | hypothetical protein                        | 0 | 1  |
| FGSG_09889 | hypothetical protein                        | 0 | 2  |
| FGSG_09895 | neutral trehalase                           | 0 | 1  |
| FGSG_09950 | hypothetical protein                        | 0 | 2  |
| FGSG_10075 | hypothetical protein                        | 2 | 2  |
| FGSG_10333 | hypothetical protein                        | 1 | 1  |
| FGSG_10351 | hypothetical protein                        | 0 | 1  |
| FGSG_10357 | hypothetical protein                        | 0 | 4  |
| FGSG_10358 | GMP synthase                                | 5 | 3  |
| FGSG_10488 | hypothetical protein                        | 0 | 1  |
| FGSG_10577 | hypothetical protein                        | 1 | 1  |
| FGSG_10620 | hypothetical protein                        | 3 | 3  |

|            |                                             |   |   |
|------------|---------------------------------------------|---|---|
| FGSG_10807 | hypothetical protein                        | 0 | 2 |
| FGSG_10812 | hypothetical protein                        | 0 | 2 |
| FGSG_10932 | hypothetical protein                        | 0 | 1 |
| FGSG_11097 | hypothetical protein                        | 0 | 1 |
| FGSG_11615 | hypothetical protein                        | 1 | 2 |
| FGSG_11638 | hypothetical protein                        | 0 | 1 |
| FGSG_11673 | hypothetical protein                        | 0 | 1 |
| FGSG_11710 | hypothetical protein                        | 0 | 1 |
| FGSG_11862 | hypothetical protein                        | 1 | 2 |
| FGSG_11884 | hypothetical protein                        | 0 | 1 |
| FGSG_11912 | hypothetical protein                        | 2 | 3 |
| FGSG_11936 | hypothetical protein                        | 1 | 3 |
| FGSG_11973 | phosphate-repressible phosphate<br>permease | 1 | 1 |
| FGSG_11981 | hypothetical protein                        | 0 | 2 |
| FGSG_12017 | hypothetical protein                        | 0 | 1 |
| FGSG_12039 | chitin synthase 6                           | 0 | 1 |
| FGSG_12040 | hypothetical protein                        | 1 | 1 |
| FGSG_12086 | hypothetical protein                        | 1 | 1 |
| FGSG_12129 | peroxisomal copper amine oxidase            | 0 | 4 |
| FGSG_12178 | hypothetical protein                        | 0 | 2 |
| FGSG_12270 | hypothetical protein                        | 0 | 2 |
| FGSG_12323 | hypothetical protein                        | 2 | 1 |
| FGSG_12369 | peroxidase/catalase 2                       | 0 | 1 |
| FGSG_12439 | hypothetical protein                        | 3 | 3 |
| FGSG_12492 | hypothetical protein                        | 0 | 4 |
| FGSG_12595 | hypothetical protein                        | 0 | 2 |
| FGSG_12745 | heat shock protein HSP98                    | 0 | 1 |
| FGSG_12781 | hypothetical protein                        | 0 | 2 |
| FGSG_12827 | hypothetical protein                        | 0 | 1 |
| FGSG_12946 | hypothetical protein                        | 0 | 1 |
| FGSG_12980 | hypothetical protein                        | 0 | 1 |
| FGSG_12985 | hypothetical protein                        | 0 | 1 |
| FGSG_13148 | hypothetical protein                        | 0 | 1 |
| FGSG_13181 | hypothetical protein                        | 3 | 1 |
| FGSG_13292 | hypothetical protein                        | 0 | 1 |
| FGSG_13342 | hypothetical protein                        | 1 | 1 |
| FGSG_13343 | glycerol kinase                             | 0 | 1 |
| FGSG_13561 | hypothetical protein                        | 0 | 2 |
| FGSG_13581 | hypothetical protein                        | 0 | 1 |
| FGSG_13620 | alpha-1,2 mannosyltransferase<br>KTR1       | 0 | 1 |
| FGSG_13634 | hypothetical protein                        | 0 | 2 |
| FGSG_13710 | hypothetical protein                        | 0 | 1 |

|            |                           |   |   |
|------------|---------------------------|---|---|
| FGSG_13715 | hypothetical protein      | 0 | 4 |
| FGSG_13823 | aconitate hydratase       | 1 | 1 |
| FGSG_13897 | amino-acid permease inda1 | 0 | 1 |
| FGSG_13946 | hypothetical protein      | 0 | 3 |
| FGSG_13966 | hypothetical protein      | 1 | 2 |
| FGSG_13987 | hypothetical protein      | 0 | 5 |
| FGSG_14031 | hypothetical protein      | 0 | 3 |

---

Table S3. Statistics of base variable frequency in *Fusarium graminearum* sequencing resistant strain YP-1.

| Base changes | Numbers of site |
|--------------|-----------------|
| A/C          | 123             |
| A/G          | 336             |
| A/T          | 123             |
| G/A          | 213             |
| G/T          | 105             |
| G/C          | 105             |
| C/G          | 126             |
| C/T          | 215             |
| C/A          | 104             |
| T/A          | 104             |
| T/C          | 336             |
| T/G          | 99              |

Table S4. *Fusarium graminearum* strains used in this study.

| Strain or mutant             | Genotype                                                                                      | Reference  |
|------------------------------|-----------------------------------------------------------------------------------------------|------------|
| 2021                         | Wild-type, phenamacril-sensitive strain                                                       | 47         |
| PH-1                         | Reference strain                                                                              | 41         |
| Y2021A-10 <sup>2</sup> -myo5 | Myosin-5 replaced by 2021's myosin-5 fragment mutant in Y2021A genetic background             | This study |
| Y2021A-24 <sup>F</sup> -myo5 | Myosin-5 replaced by Y2021F's myosin-5 fragment mutant in Y2021A genetic background           | This study |
| YP-1                         | Phenamacril-resistant strain generated from the reference strain PH-1 by fungicide treatment  | This study |
| Y2021A                       |                                                                                               | 47         |
| Y2021B                       |                                                                                               | This study |
| Y2021C                       | Phenamacril-resistant strains generated from the wild-type strain 2021 by fungicide treatment | This study |
| Y2021D                       |                                                                                               | This study |
| Y2021F                       |                                                                                               | This study |
| 2021-12 <sup>A</sup> -myo5   | Myosin-5 replaced by Y2021A's myosin-5 fragment mutant in 2021 genetic background             | This study |
| 2021-22 <sup>B</sup> -myo5   | Myosin-5 replaced by Y2021B's myosin-5 fragment mutant in 2021 genetic background             | This study |
| 2021-9 <sup>C</sup> -myo5    | Myosin-5 replaced by Y2021C's myosin-5 fragment mutant in 2021 genetic background             | This study |
| 2021-19 <sup>D</sup> -myo5   | Myosin-5 replaced by Y2021D's myosin-5 fragment mutant in 2021 genetic background             | This study |
| 2021-13 <sup>F</sup> -myo5   | Myosin-5 replaced by Y2021F's myosin-5 fragment mutant in 2021 genetic background             | This study |

Table S5. Pathway of the more differentially expressed genes based on the KEGG database.

| Pathway                                      | Up-regulated genes                                                                                                                              | Down-regulated genes                                                                                                                                                                                                                                                                                                                                                                                                                           |
|----------------------------------------------|-------------------------------------------------------------------------------------------------------------------------------------------------|------------------------------------------------------------------------------------------------------------------------------------------------------------------------------------------------------------------------------------------------------------------------------------------------------------------------------------------------------------------------------------------------------------------------------------------------|
| Drug metabolism cytochrome P450              | FGSG_07685                                                                                                                                      | FGSG_02291, FGSG_04214, FGSG_03915, FGSG_10200, FGSG_05382, FGSG_11097, FGSG_04194                                                                                                                                                                                                                                                                                                                                                             |
| Microbial metabolism in diverse environments | FGSG_13963, FGSG_07685, FGSG_12344, FGSG_11542, FGSG_02217, FGSG_13962, FGSG_07080, FGSG_02906, FGSG_07838, FGSG_00489, FGSG_01692, FGSG_03996, | FGSG_02291, FGSG_10198, FGSG_01581, FGSG_05623, FGSG_09572, FGSG_04214, FGSG_08875, FGSG_00321, FGSG_13444, FGSG_08463, FGSG_10120, FGSG_08443, FGSG_01433, FGSG_00810, FGSG_09280, FGSG_05048, FGSG_02063, FGSG_00175, FGSG_09913, FGSG_03402, FGSG_02482, FGSG_03915, FGSG_01698, FGSG_10200, FGSG_06681, FGSG_05382, FGSG_04196, FGSG_05130, FGSG_06290, FGSG_02974, FGSG_08941, FGSG_11332, FGSG_04194, FGSG_10893, FGSG_03590, FGSG_13714 |
| Cyanoamino acid metabolism                   | FGSG_00596, FGSG_10659,                                                                                                                         | FGSG_12231, FGSG_10250, FGSG_06480, FGSG_00313, FGSG_03387, FGSG_01685, FGSG_10859, FGSG_01698, FGSG_09141, FGSG_06290                                                                                                                                                                                                                                                                                                                         |
| Butanoate metabolism                         | FGSG_13963, FGSG_13962,                                                                                                                         | FGSG_03936, FGSG_05554, FGSG_09494, FGSG_01086, FGSG_06342, FGSG_05128, FGSG_01581, FGSG_00321, FGSG_04103, FGSG_06282, FGSG_00600, FGSG_05048, FGSG_02063, FGSG_04196, FGSG_08941                                                                                                                                                                                                                                                             |
| Aminobenzoate degradation                    | FGSG_07080, FGSG_07838, FGSG_00489, FGSG_03996,                                                                                                 | FGSG_02824, FGSG_04302, FGSG_04736, FGSG_07678, FGSG_03199, FGSG_13176, FGSG_10250, FGSG_13444, FGSG_10120, FGSG_09913, FGSG_03402, FGSG_01698                                                                                                                                                                                                                                                                                                 |
| Bisphenol degradation                        | FGSG_13962, FGSG_07080,                                                                                                                         | FGSG_02824, FGSG_04302,                                                                                                                                                                                                                                                                                                                                                                                                                        |



|                                             |                  |                                                                                                                                                                                                                                                                                                                                                             |  |                                                                                                                                                                                                         |
|---------------------------------------------|------------------|-------------------------------------------------------------------------------------------------------------------------------------------------------------------------------------------------------------------------------------------------------------------------------------------------------------------------------------------------------------|--|---------------------------------------------------------------------------------------------------------------------------------------------------------------------------------------------------------|
|                                             |                  | FGSG_00489,                                                                                                                                                                                                                                                                                                                                                 |  | FGSG_09494, FGSG_04736,<br>FGSG_05128, FGSG_00321,<br>FGSG_10120, FGSG_05048,<br>FGSG_02063, FGSG_09913,<br>FGSG_08941                                                                                  |
| Ribosome<br>eukaryotes                      | biogenesis<br>in | FGSG_00270, FGSG_02511,<br>FGSG_04424, FGSG_01386,<br>FGSG_00892, FGSG_07262,<br>FGSG_01185, FGSG_07055,<br>FGSG_07258, FGSG_00485,<br>FGSG_06340, FGSG_00732,<br>FGSG_09795, FGSG_05081,<br>FGSG_06070, FGSG_10033,<br>FGSG_06788, FGSG_07206,<br>FGSG_01102, FGSG_10908,<br>FGSG_07379, FGSG_08759,<br>FGSG_10940, FGSG_10219,<br>FGSG_06165, FGSG_01870, |  | FGSG_03933, FGSG_02500                                                                                                                                                                                  |
| Methane metabolism                          |                  | FGSG_07685, FGSG_02217,<br>FGSG_01692,                                                                                                                                                                                                                                                                                                                      |  | FGSG_07277, FGSG_00330,<br>FGSG_07127, FGSG_06127,<br>FGSG_02427, FGSG_00475,<br>FGSG_09572, FGSG_00810,<br>FGSG_09280, FGSG_03915,<br>FGSG_10200, FGSG_06681,<br>FGSG_06290, FGSG_02974,<br>FGSG_10893 |
| Glycine, serine and threonine<br>metabolism |                  | FGSG_12344, FGSG_03626,<br>FGSG_07266, FGSG_04468,<br>FGSG_06544, FGSG_01692,<br>FGSG_08407,                                                                                                                                                                                                                                                                |  | FGSG_02357, FGSG_12373,<br>FGSG_08055, FGSG_03638,<br>FGSG_00118, FGSG_02427,<br>FGSG_05623, FGSG_00810,<br>FGSG_10743, FGSG_06290,<br>FGSG_10893                                                       |
| Peroxisome                                  |                  | FGSG_11413, FGSG_02217,<br>FGSG_04333,                                                                                                                                                                                                                                                                                                                      |  | FGSG_11069, FGSG_04217,<br>FGSG_05011, FGSG_02287,<br>FGSG_10672, FGSG_07173,<br>FGSG_07104, FGSG_05596,<br>FGSG_06012, FGSG_09424,<br>FGSG_09263, FGSG_10893,<br>FGSG_00840, FGSG_05379,<br>FGSG_09756 |

---

Table S6. Transcription data for myosin-5, myosin-2B, and type II myosin for strains 2021 and Y2021A of *F. graminearum* in RNA-seq.

| <b>Gene</b> | <b>Description</b> | <b>Length<sup>a</sup></b> | <b>Fold-change<br/>Y2021A/2021<sup>b</sup></b> | <b>Fold-change<br/>2021+/2021<sup>c</sup></b> | <b>Fold-change<br/>Y2021A+/Y2021A<sup>d</sup></b> |
|-------------|--------------------|---------------------------|------------------------------------------------|-----------------------------------------------|---------------------------------------------------|
| FGSG_01410  | Myosin-5           | 3645                      | -1.18                                          | 1.07                                          | 1.49                                              |
| FGSG_07469  | Myosin-2B          | 4752                      | 1.11                                           | 1.27                                          | 1.51                                              |
| FGSG_08719  | Type II myosin     | 7029                      | -1.29                                          | 1.15                                          | 1.72                                              |

<sup>a</sup> mRNA length in bp.

<sup>b</sup> The fold-change is the ratio of RPKM Y2021A to RPKM 2021.

<sup>c</sup> The fold-change is the ratio of RPKM 2021+ to RPKM 2021. 2021+ represents sensitive strain 2021 treated with 0.21 µg/ml JS399-19 (EC<sub>50</sub>).

<sup>d</sup> The fold-change is the ratio of RPKM Y2021A+ to RPKM Y2021A. Y2021A+ represents resistant strain Y2021A treated with 204 µg/ml JS399-19 (EC<sub>50</sub>).
